# Supplementary material for: Severely exacerbated neuromyelitis optica rat model with extensive astrocytopathy by high affinity anti-aquaporin-4 monoclonal antibody
Source: PubMed Central journal article supplement (PMC4670539; doi:10.1186/s40478-015-0259-2), 2015-12-04

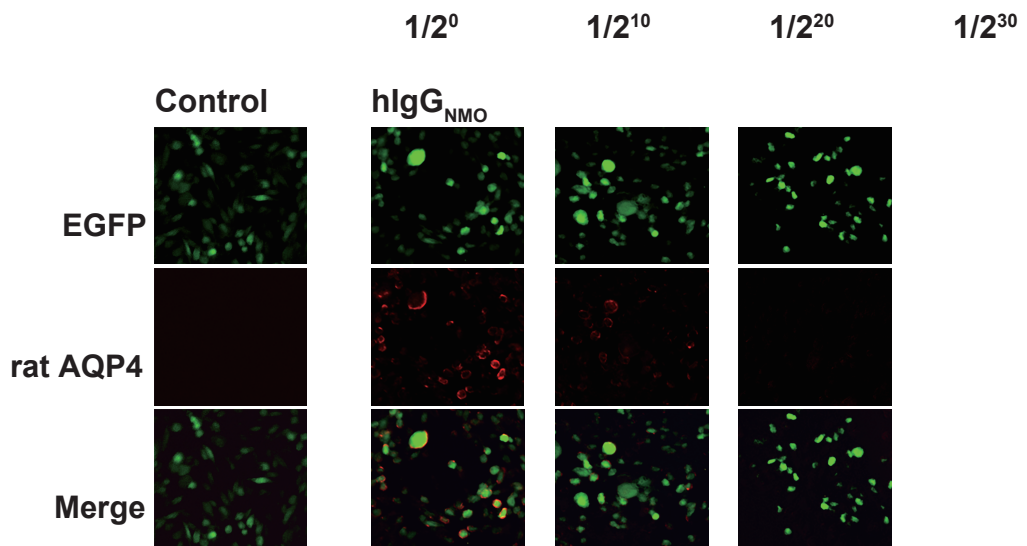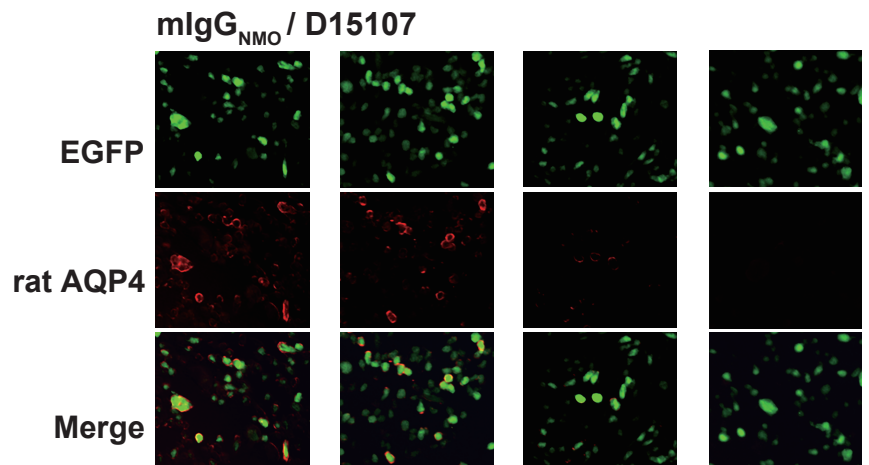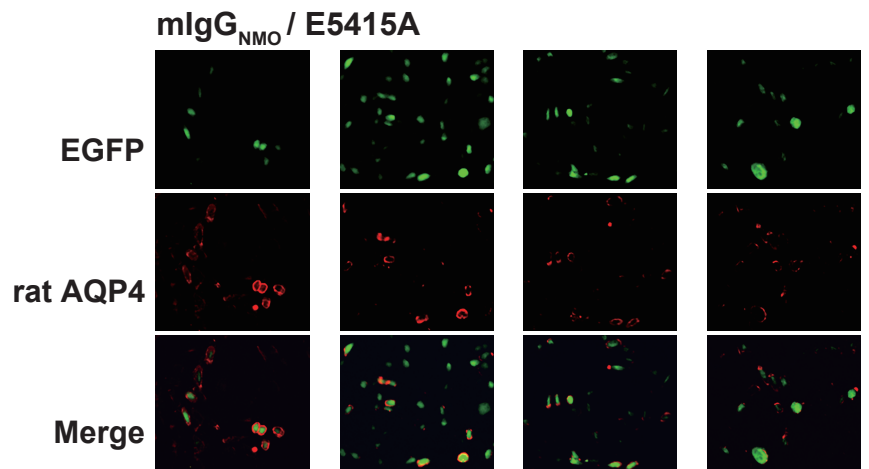

Supplement: 40478_2015_259_MOESM2_ESM.pdf [file 40478_2015_259_MOESM2_ESM.pdf]
